# Supplementary material for: Patterns of Daily Motor-Symptom Control with Carbidopa/Levodopa Enteral Suspension Versus Oral Carbidopa/Levodopa Therapy in Advanced Parkinson’s Disease: Clinical Trial Post Hoc Analyses
Source: Springer Nature journal article supplement (doi:10.1007/s40120-022-00332-0), 2022-02-22
Supplement: MOESM1 [file 20157318]

**Supplementary material for:**

**Patterns of Daily Motor-Symptom Control with Carbidopa/Levodopa Enteral Suspension Versus Oral Carbidopa/Levodopa in Advanced Parkinson's Disease: Clinical Trial Post-hoc Analyses**

**Authors:** Rajesh Pahwa,<sup>1</sup> Jason Aldred,<sup>2</sup> Niodita Gupta,<sup>3</sup> Emi Terasawa,<sup>4</sup> Viviana Garcia-Horton,<sup>4</sup> David R. Steffen,<sup>4</sup> Prasanna L. Kandukuri,<sup>3</sup> Vivek S. Chaudhari,<sup>3</sup> Yash J. Jalundhwala,<sup>3</sup> Yanjun Bao,<sup>3</sup> Pavnit Kukreja,<sup>3</sup> Stuart H. Isaacson<sup>5</sup>

**Affiliations:**

<sup>1</sup>University of Kansas Medical Center, Kansas City, KS, USA

<sup>2</sup>Selkirk Neurology, Spokane, Washington, USA

<sup>3</sup>AbbVie Inc., North Chicago, IL, USA

<sup>4</sup>Analysis Group, Inc., New York, NY, USA

<sup>5</sup>Parkinson's Disease and Movement Disorders Center, Boca Raton, FL, USA

**Corresponding author: Dr. Rajesh Pahwa**

Address: University of Kansas Medical Center, 3901 Rainbow Boulevard, Kansas City, KS 66160.

Email: [rpahwa@kumc.edu](mailto:rpahwa@kumc.edu)

**Supplementary Table S1. Baseline characteristics**

|                                                    | <b>CLES</b>   |          | <b>IR-CL</b>  |          |
|----------------------------------------------------|---------------|----------|---------------|----------|
|                                                    | <b>N = 33</b> |          | <b>N = 30</b> |          |
| <b><i>Demographic Characteristics</i></b>          |               |          |               |          |
| Age (years), mean (SD)                             | 64.0          | (9.7)    | 64.9          | (6.6)    |
| Age category, n (%)                                |               |          |               |          |
| < 65 years                                         | 18            | (54.5%)  | 13            | (43.3%)  |
| ≥ 65 years                                         | 15            | (45.5%)  | 17            | (56.7%)  |
| Male, n (%)                                        | 22            | (66.7%)  | 21            | (70.0%)  |
| Race, n (%)                                        |               |          |               |          |
| White                                              | 32            | (97.0%)  | 27            | (90.0%)  |
| Black, of African heritage or African American     | 0             | (0.0%)   | 0             | (0.0%)   |
| American Indian or Alaska Native                   | 1             | (3.0%)   | 0             | (0.0%)   |
| Asian                                              | 0             | (0.0%)   | 3             | (10.0%)  |
| Native Hawaiian or other Pacific Islander          | 0             | (0.0%)   | 0             | (0.0%)   |
| Ethnicity, n (%)                                   |               |          |               |          |
| Hispanic or Latino                                 | 2             | (6.1%)   | 1             | (3.3%)   |
| Not Hispanic or Latino                             | 31            | (93.9%)  | 29            | (96.7%)  |
| Country, n (%)                                     |               |          |               |          |
| Germany                                            | 6             | (18.2%)  | 7             | (23.3%)  |
| New Zealand                                        | 1             | (3.0%)   | 1             | (3.3%)   |
| United States                                      | 26            | (78.8%)  | 22            | (73.3%)  |
| <b><i>Clinical Characteristics</i></b>             |               |          |               |          |
| Height (cm), mean (SD)                             | 171.4         | (9.3)    | 171.4         | (10.4)   |
| Weight (kg), mean (SD)                             | 75.7          | (17.2)   | 75.5          | (19.8)   |
| BMI (kg/m <sup>2</sup> ), mean (SD)                | 25.6          | (4.6)    | 25.6          | (5.5)    |
| <b><i>Disease-Related Characteristics</i></b>      |               |          |               |          |
| Advanced PD-related medical history                |               |          |               |          |
| Duration of Parkinson's disease (years), mean (SD) | 10.2          | (4.9)    | 11.8          | (5.7)    |
| Diagnosis of bradykinesia, n (%)                   | 33            | (100.0%) | 30            | (100.0%) |
| Diagnosis of muscular rigidity, n (%)              | 33            | (100.0%) | 30            | (100.0%) |
| Diagnosis of 4-6 Hz resting tremor, n (%)          | 26            | (78.8%)  | 24            | (80.0%)  |
| Diagnosis of postural instability, n (%)           | 20            | (60.6%)  | 20            | (66.7%)  |
| Baseline disease severity, mean (SD)               |               |          |               |          |
| CGI-S                                              | 4.2           | (0.7)    | 4.6           | (0.7)    |
| Modified Hoehn and Yahr staging                    | 2.3           | (0.7)    | 2.6           | (0.7)    |
| <b><i>Treatment Characteristics</i></b>            |               |          |               |          |
| Antiparkinsonian medication use, n (%)             | 33            | (100.0%) | 30            | (100.0%) |
| Dopamine agonists                                  | 20            | (60.6%)  | 22            | (73.3%)  |

|                                                 |        |         |        |         |
|-------------------------------------------------|--------|---------|--------|---------|
| COMT inhibitors                                 | 16     | (48.5%) | 14     | (46.7%) |
| MAO-B inhibitors                                | 14     | (42.4%) | 7      | (23.3%) |
| Parkinson's disease treatment history, n (%)    |        |         |        |         |
| Taking only one PD medication                   | 5      | (15.2%) | 2      | (6.7%)  |
| Taking two PD medications                       | 10     | (30.3%) | 10     | (33.3%) |
| Taking three PD medications                     | 9      | (27.3%) | 10     | (33.3%) |
| Taking > three PD medications                   | 9      | (27.3%) | 8      | (26.7%) |
| Baseline daily dose of levodopa (mg), mean (SD) | 1027.3 | (382.0) | 1145.0 | (481.4) |

### Abbreviations:

BMI: body mass index; CGI-S: Clinical global impression - severity; cm: centimeters; CLES: carbidopa/levodopa enteral suspension; COMT: catechol-O-methyl transferase; Hz: hertz; IR-CL: immediate-release carbidopa/levodopa; kg: kilograms; m: meters; MAO-B: monoamine oxidase B; PD: Parkinson's Disease; SD: standard deviation.

### Notes:

[1] Pooled data from NCT00357994 and NCT00660387 (full analysis sample).

[2] From the full analysis sample, three patients (one from the CLES group and two from the IR-CL group) were removed due to missing data in week 12. In addition, three patients (two from the CLES group and one from the IR-CL group) were removed due to one or more invalid diary days on days that would be used in the calculation of health state-related outcomes.

**Supplementary Table S2. Improvement in health states across the waking day between CLES and IR-CL and Change from baseline to week 12 in patients with occurrence of extreme fluctuations and number of transitions**

|                                                                                             | Treatment difference [CLES - IR-CL] |               |                            |   |
|---------------------------------------------------------------------------------------------|-------------------------------------|---------------|----------------------------|---|
| <b>Table S2a. Improvement in health states across the waking day between CLES and IR-CL</b> | <b>LS Mean</b>                      | <b>95% CI</b> | <b>P-value<sup>1</sup></b> |   |
| <i>Average duration (minutes), mean (SD)</i>                                                |                                     |               |                            |   |
| <b>"Off" time [OFF]</b>                                                                     |                                     |               |                            |   |
| From wake-up time to 4 hours after wake-up time                                             | -82                                 | (-128, -35)   | 0.0008                     | * |
| From 4 hours after wake-up time to 8 hours after wake-up time                               | -37                                 | (-70, -3)     | 0.0325                     | * |
| From 8 hours after wake-up time to 12 hours after wake-up time                              | -51                                 | (-95, -6)     | 0.0272                     | * |
| From 12 hours after wake-up time to end of waking day                                       | -25                                 | (-79, 28)     | 0.3451                     |   |
| <b>"On" time without troublesome dyskinesia [ON-woTD]</b>                                   |                                     |               |                            |   |
| From wake-up time to 4 hours after wake-up time                                             | 44                                  | (13, 74)      | 0.0058                     | * |
| From 4 hours after wake-up time to 8 hours after wake-up time                               | 18                                  | (-12, 48)     | 0.2362                     |   |
| From 8 hours after wake-up time to 12 hours after wake-up time                              | 35                                  | (5, 66)       | 0.0240                     | * |
| From 12 hours after wake-up time to end of waking day                                       | 11                                  | (-21, 43)     | 0.4840                     |   |

|                                                                                                                                 | Change from Baseline |          |                |   |               |          |                |   |
|---------------------------------------------------------------------------------------------------------------------------------|----------------------|----------|----------------|---|---------------|----------|----------------|---|
| <b>Table S2b. Change from baseline to week 12 in patients with occurrence of extreme fluctuations and number of transitions</b> | <b>CLES</b>          |          | <b>P-value</b> |   | <b>IR-CL</b>  |          | <b>P-value</b> |   |
| Analysis sample size                                                                                                            | <b>N = 33</b>        |          |                |   | <b>N = 30</b> |          |                |   |
| <b><i>Health state fluctuations<sup>2</sup></i></b>                                                                             |                      |          |                |   |               |          |                |   |
| Patients with occurrence of extreme fluctuations in a day, N (%)                                                                | -6                   | (-18.2%) | 0.0143         | * | -4            | (-13.3%) | 0.2059         |   |
| <b><i>Transitions between health states during the waking day<sup>3</sup></i></b>                                               |                      |          |                |   |               |          |                |   |
| Number of health-state transitions, mean (SD)                                                                                   | -3.5                 | (3.2)    | 0.0000         | * | -2.0          | (3.3)    | 0.0044         | * |
| Distribution of health-state transitions across patients, N (%)                                                                 |                      |          | <0.0001        | * |               |          | 0.0043         | * |
| 0 to 3 transitions                                                                                                              | +13                  | (+39.4%) |                |   | +2            | (+6.7%)  |                |   |
| > 3 and up to 6 transitions                                                                                                     | +4                   | (+12.1%) |                |   | +4            | (+13.3%) |                |   |
| > 6 and up to 9 transitions                                                                                                     | -10                  | (-30.3%) |                |   | +0            | (+0.0%)  |                |   |
| > 9 and up to 12 transitions                                                                                                    | -4                   | (-12.1%) |                |   | -3            | (-10.0%) |                |   |
| > 12 transitions                                                                                                                | -3                   | (-9.1%)  |                |   | -3            | (-10.0%) |                |   |

**Abbreviations:**

CI: confidence interval; CLES: carbidopa/levodopa enteral suspension; IR-CL: immediate-release carbidopa/levodopa; SD: standard deviation.

**Notes:**

[1] The p-value for treatment difference was obtained from analysis of covariance (ANCOVA) models, including effects for treatment, country, and with the corresponding baseline value as a covariate. An asterisk "\*" denotes a p-value < 0.05.

[2] Comparisons within the treatment groups between baseline and week 12 outcome levels were conducted using McNemar's tests. An asterisk "\*" denotes a p-value < 0.05.

[3] Comparisons within the treatment groups between baseline and week 12 outcome levels were conducted using Wilcoxon signed-rank tests for continuous outcomes and multinomial logit models with cluster-robust standard errors clustered at the patient level and finite-sample adjustment for the distributions of the categorical outcomes. An asterisk "\*" denotes a p-value < 0.05.

**Supplementary Table S3. Average levodopa dose at week 12**

|                                                                 | <b>CLES</b>   |          | <b>IR-CL</b>  |          | <b>P-value</b> |
|-----------------------------------------------------------------|---------------|----------|---------------|----------|----------------|
|                                                                 | <b>N = 33</b> |          | <b>N = 30</b> |          |                |
| Average levodopa dose within 4 hours of waking (mg), mean (SD)  | 368.09        | (140.46) | 382.82        | (182.55) | 0.9713         |
| Average levodopa dose during the waking day (mg), mean (SD)     | 1162.38       | (420.60) | 1413.99       | (612.61) | 0.1080         |
| Received levodopa dose outside of the waking day, N (%)         | 8             | (24.2%)  | 9             | (30.0%)  | 0.6071         |
| Average levodopa dose outside of the waking day (mg), mean (SD) | 131.25        | (59.39)  | 98.98         | (46.45)  | 0.2447         |
